# Supplementary material for: Oxidative stress and autophagy-mediated immune patterns and tumor microenvironment infiltration characterization in gastric cancer
Source: Aging (Albany NY). 2023 Nov 9;15(21):12513–36. doi: 10.18632/aging.205194 (PMC10683600; doi:10.18632/aging.205194)
Supplement: Supplementary Figures [file aging-15-205194-s001.pdf]

## SUPPLEMENTARY FIGURES

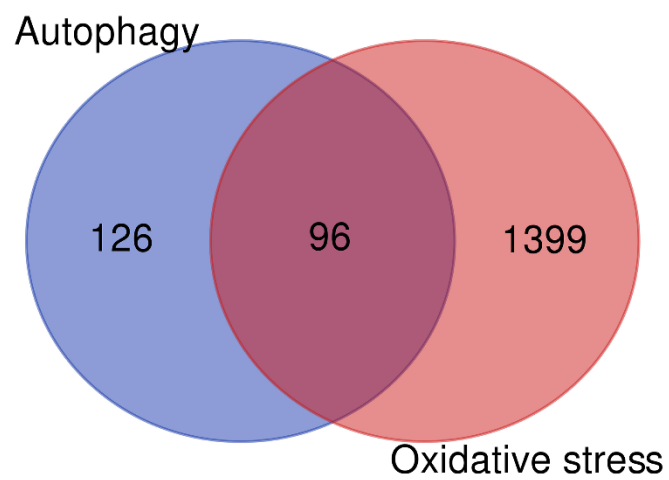

Supplementary Figure 1. Venn diagram to find 96 OARGs.

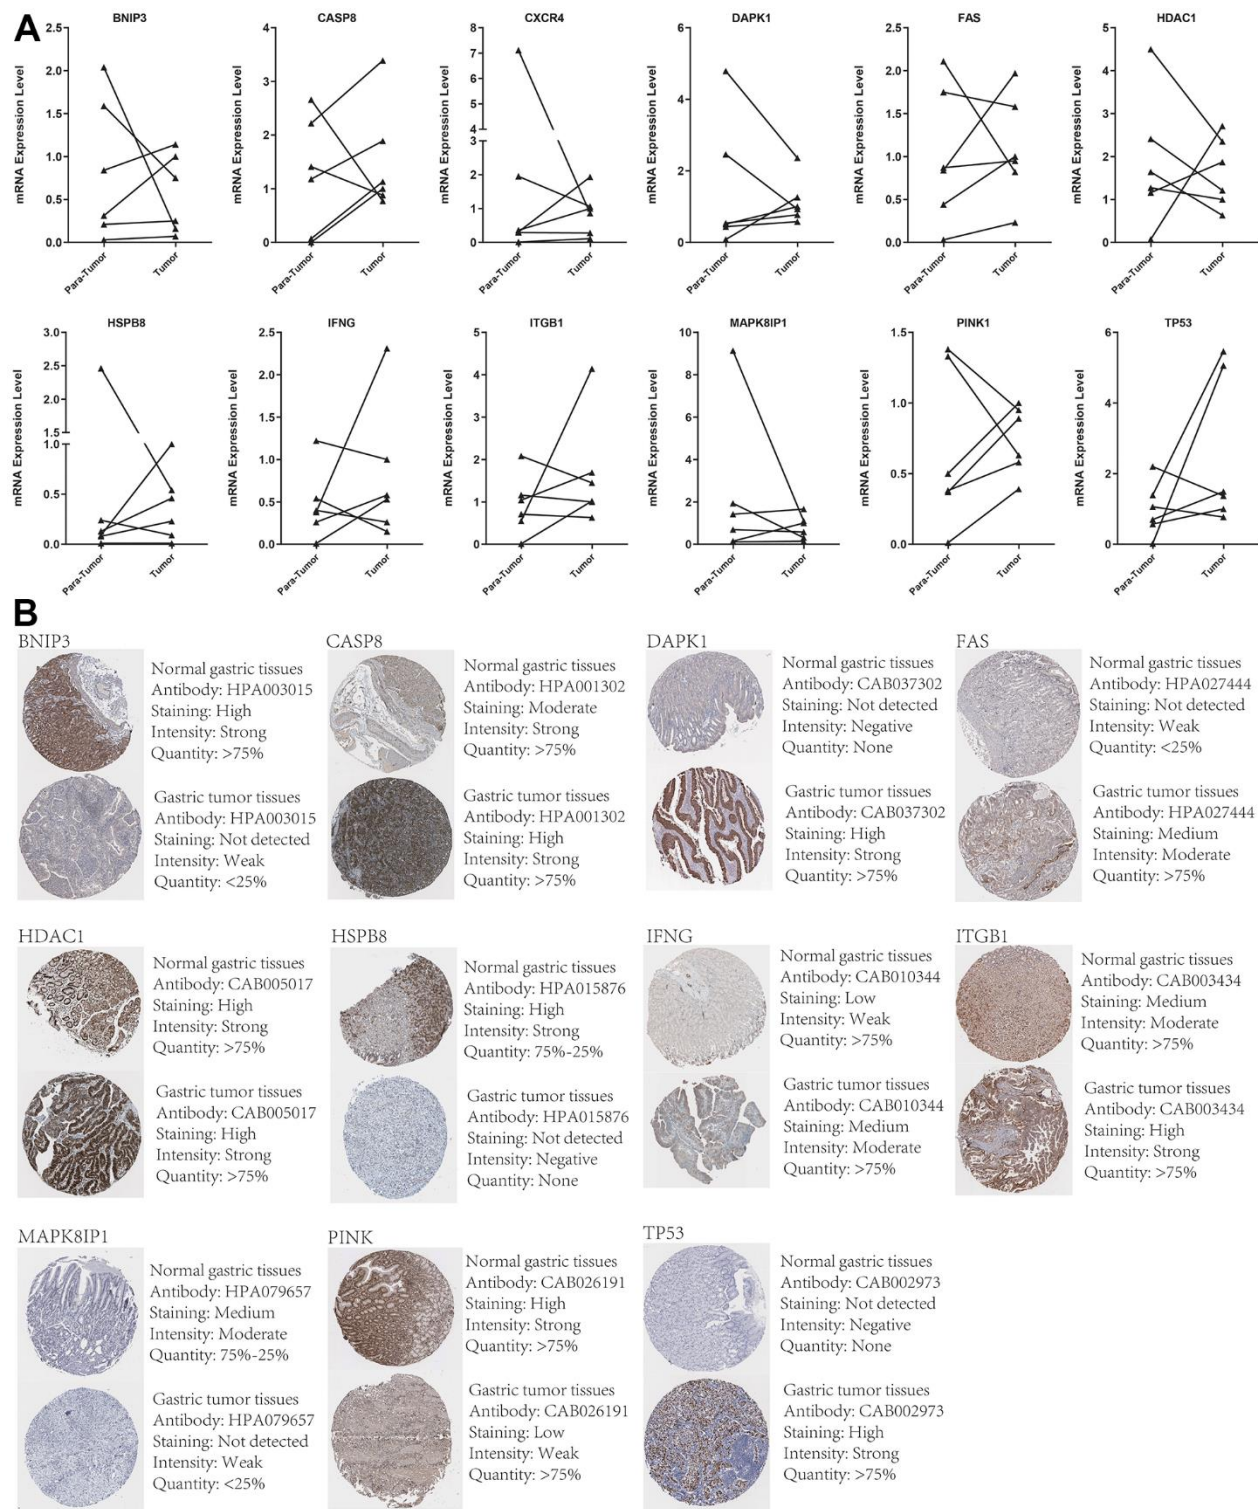

**Supplementary Figure 2. Validation of the expression traits of OARGs. (A)** RT-PCR of clinical samples (tumor tissues vs normal adjacent tissue). **(B)** Immunohistochemistry of clinical samples.

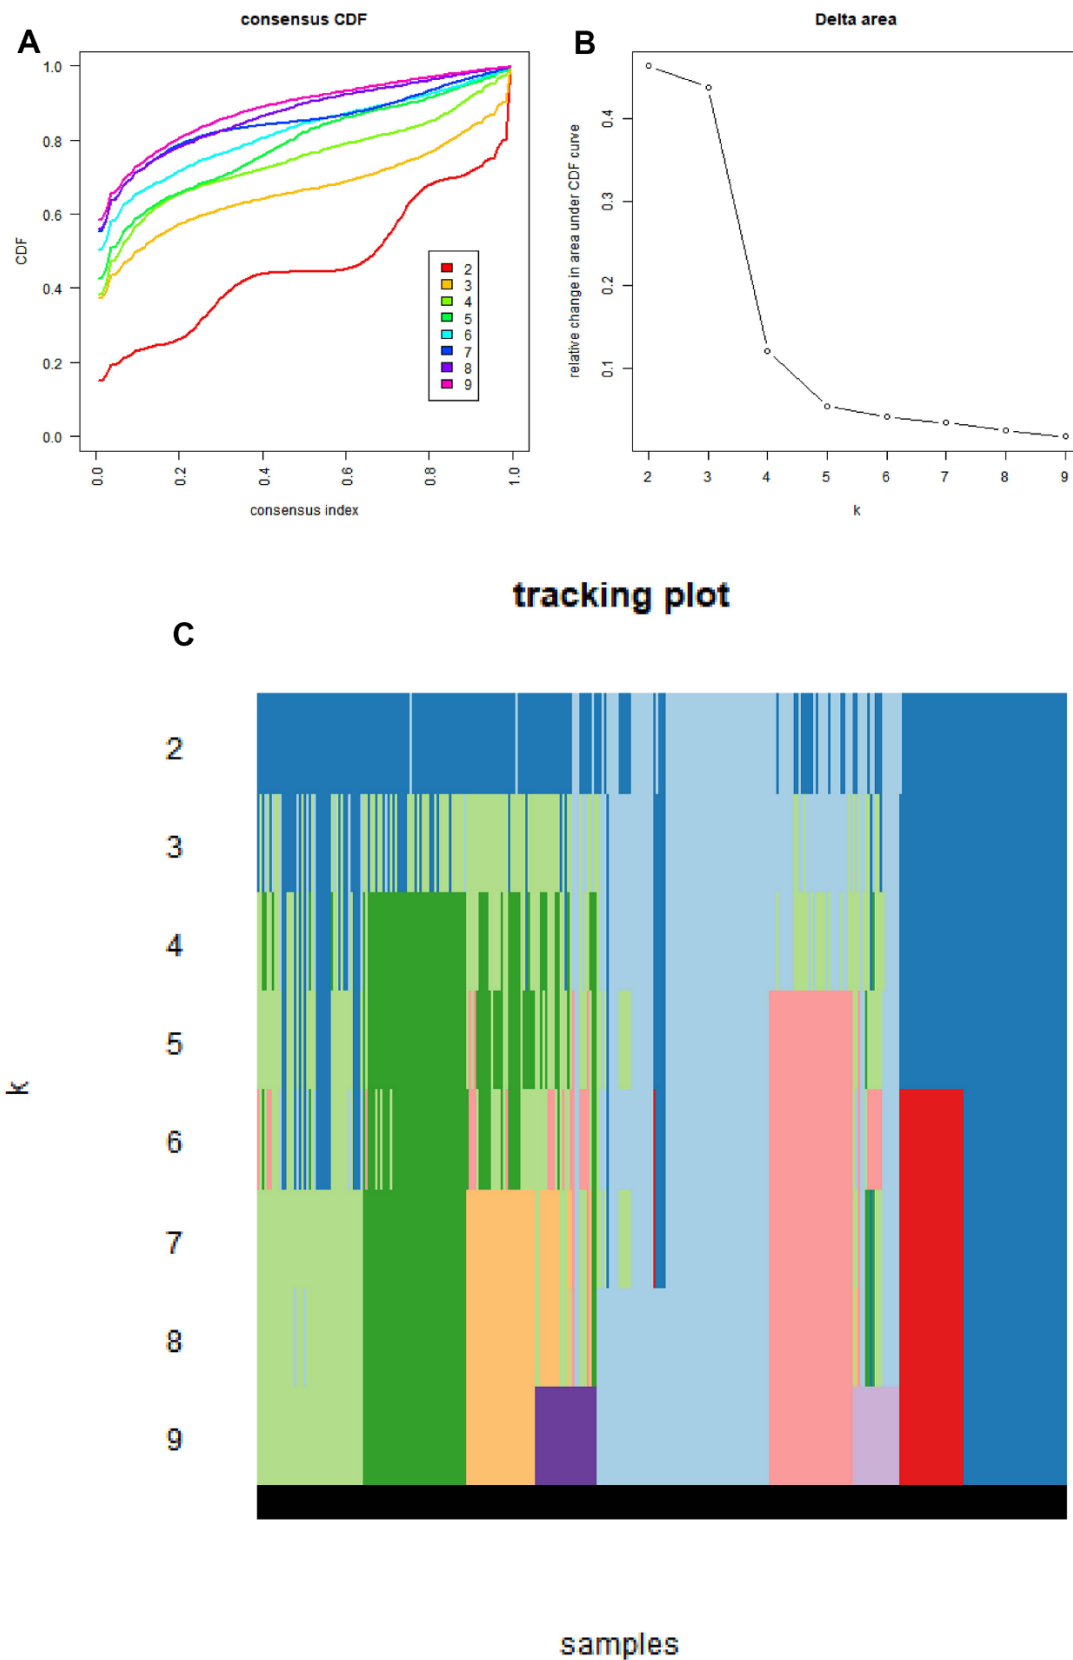

**Supplementary Figure 3. Unsupervised cluster analysis to establish OARG clusters.** (A) CDF cumulative distribution curve. (B) Area under the CDF curve. (C) Tracking plot.

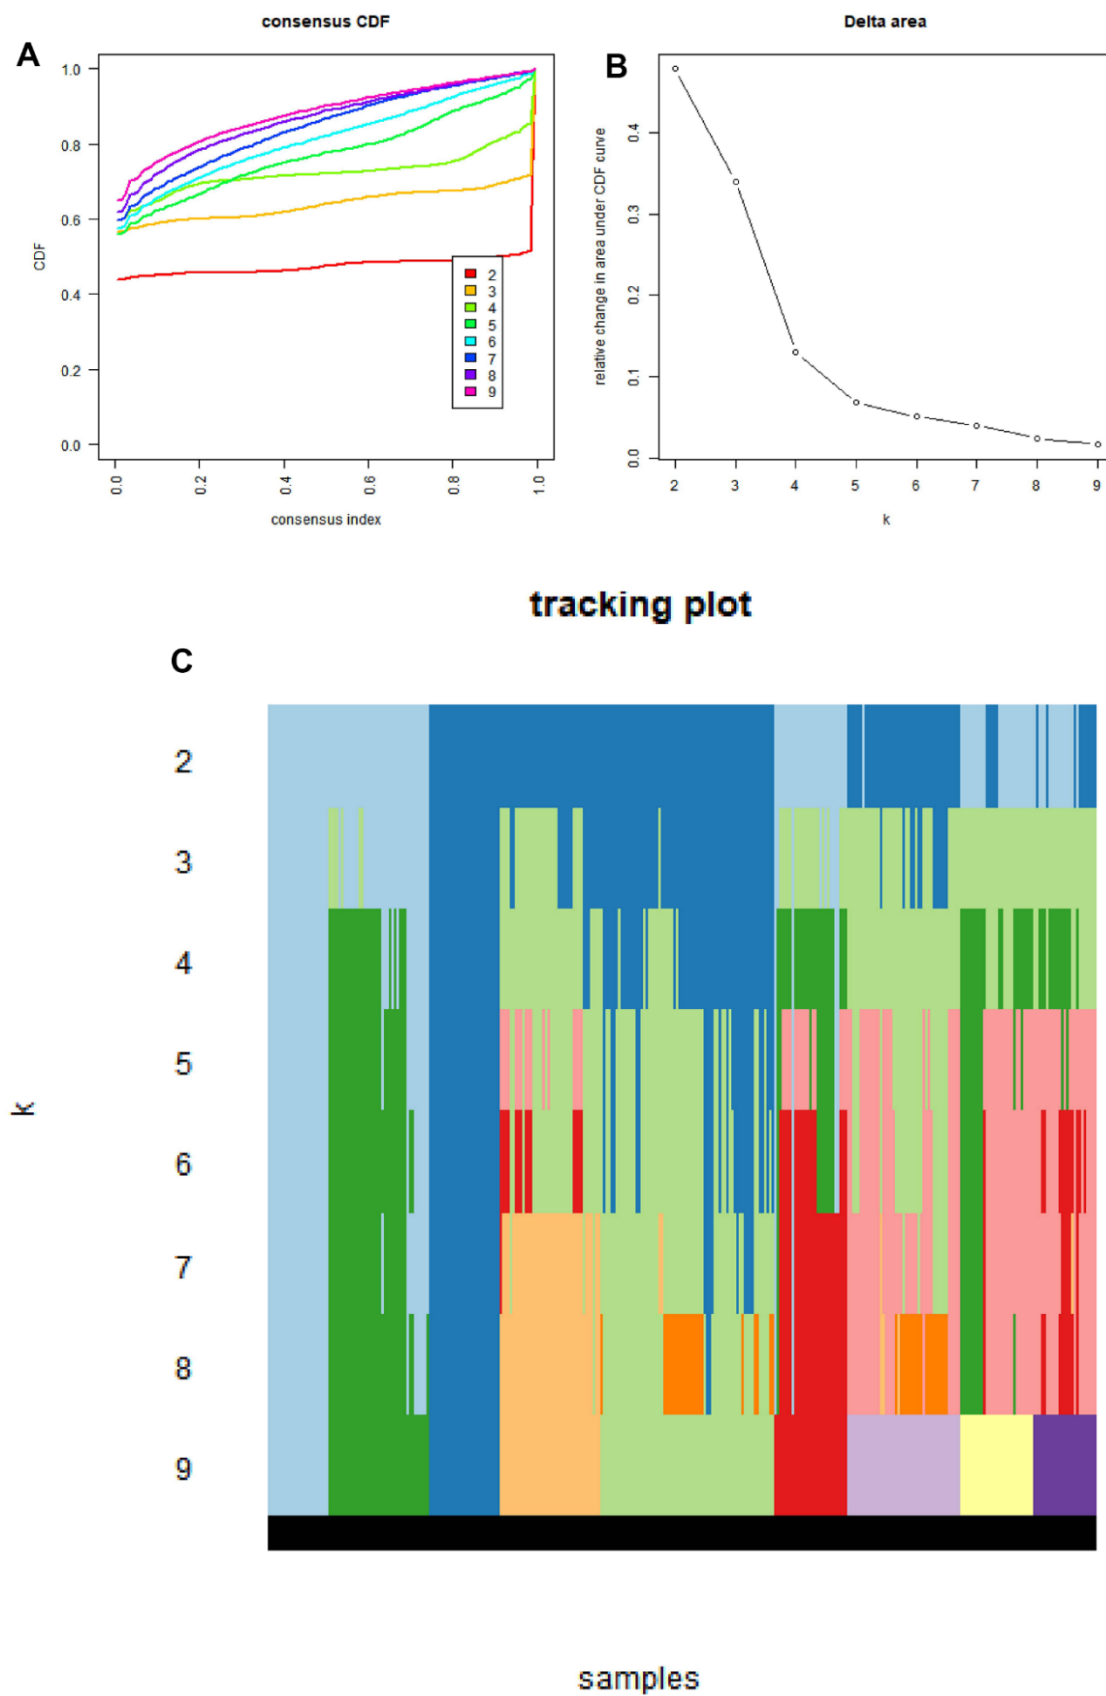

**Supplementary Figure 4. Unsupervised cluster analysis to establish gene clusters. (A)** CDF cumulative distribution curve. **(B)** Area under the CDF curve. **(C)** Tracking plot.

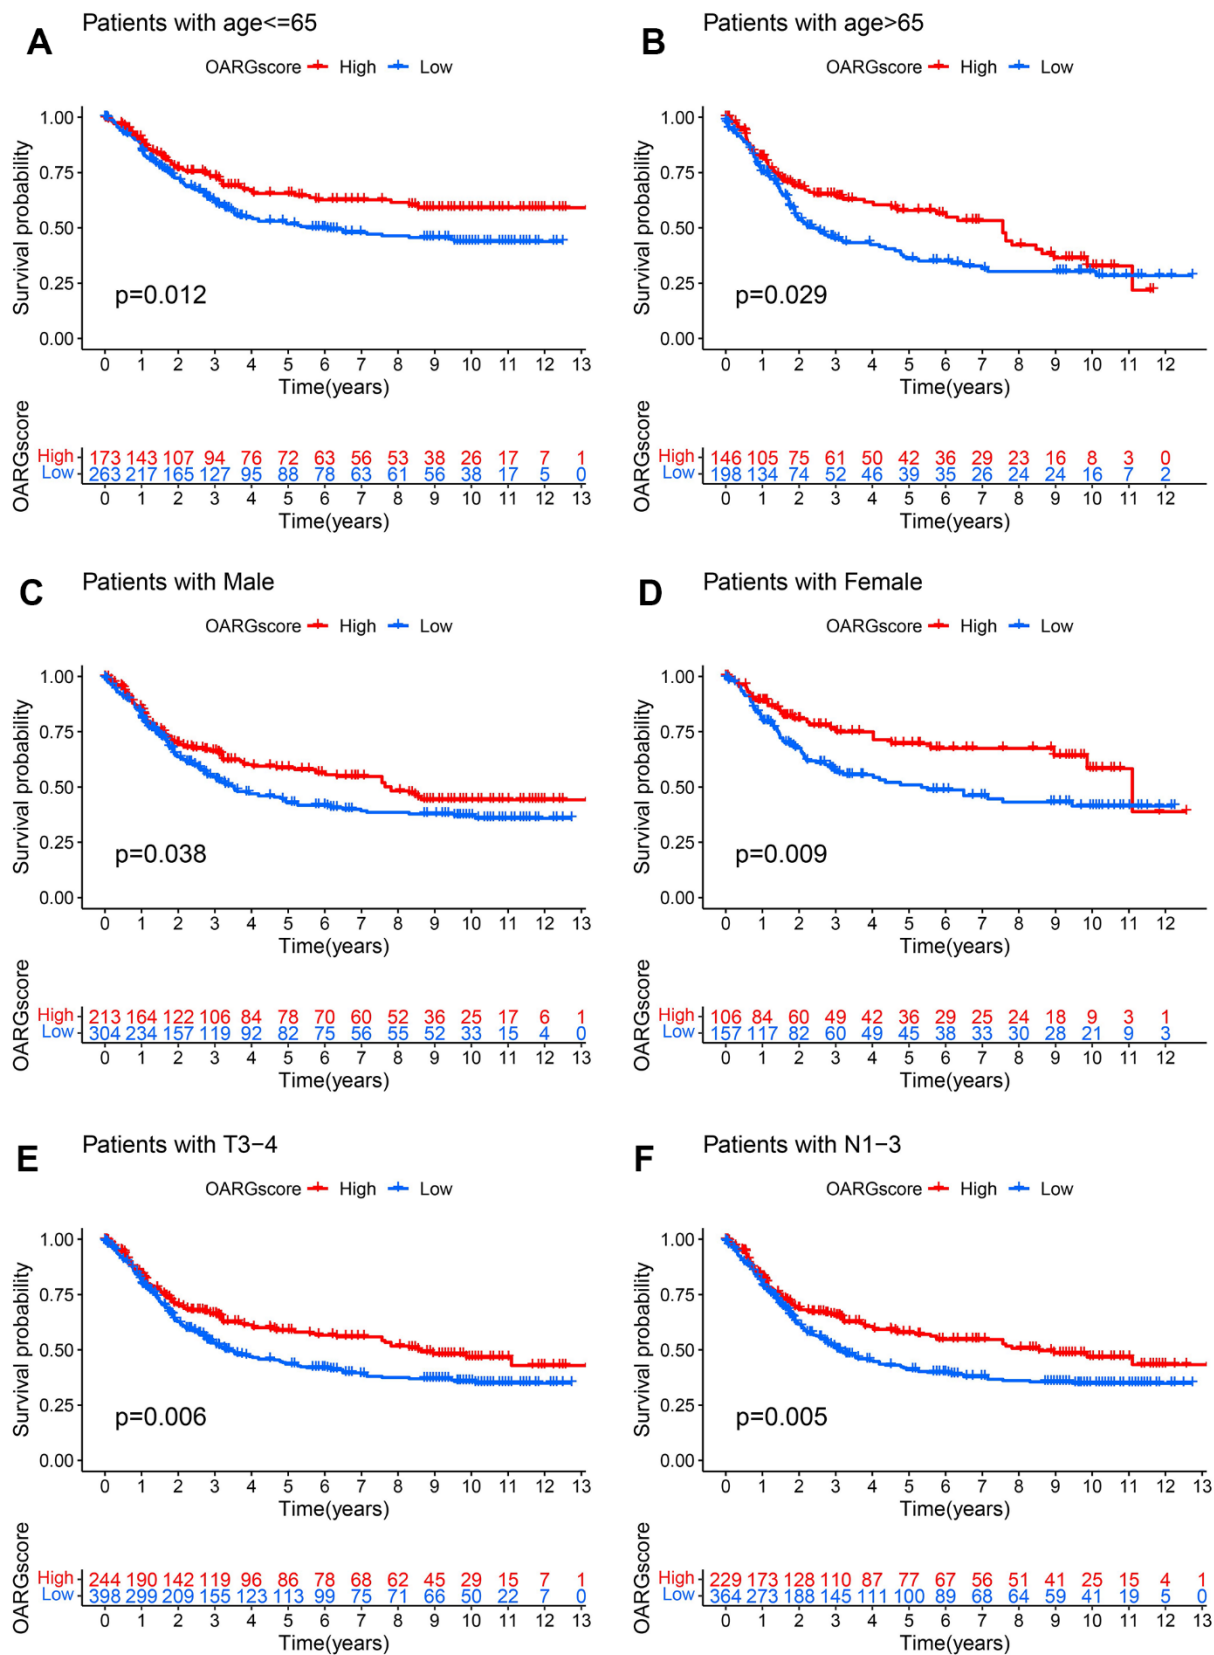

**Supplementary Figure 5. Survival analysis between OARGscore and different types of patients.** (A, B) Survival analysis between OARGscore and patients of age  $\geq/\leq 65$ . (C, D) Survival analysis between OARGscore and patients of different gender. (E) Survival analysis between OARGscore and patients with T3-4. (F) Survival analysis between OARGscore and patients with N1-3.
